# Supplementary material for: C-Raf Is Required for the Initiation of Lung Cancer by K-RasG12D
Source: Oxford University Press journal article supplement (doi:10.1158/2159-8290.cd-10-0044), 2011-05-12
Supplement: 21598290cd100044-sup-sfiglegs_1-4.pdf [file 21598290cd100044-sup-sfiglegs_1-4.pdf]

### **Supplementary Figure Legends**

Supplementary Figure 1: Effect of Raf deficiency on K-Ras<sup>G12D</sup>-mediated transformation of MEFs. (A) Increase in cell number of Ad-Cre infected MEFs of the indicated genotypes relative to Ad-Mock infected isogenic control cells. Cells were analyzed in 2% serum. The fold increase of proliferation of Ad-Cre infected cells compared to Ad-Mock infected isogenic control cells is shown. (B) Focus formation assay. B-Raf or C-Raf deficiency does not impair the ability of K-Ras<sup>G12D</sup> MEFs to form foci (arrows). (C) Western blot analysis of MAPK activation in response to K-Ras<sup>G12D</sup> expression. M, Ad-Mock infected cells; C, Ad-Cre infected cells. (D) Western blot for pERK. K, BBK, and CCK MEFs were serum starved overnight and re-stimulated with 10% FCS for the indicated time points.

Supplementary Figure 2: Individual proliferation curves of K, BBK, and CCK MEFs grown in 10% and 2% fetal calf serum. B-Raf or C-Raf deficiency does not prevent increased proliferation of MEFs expressing K-Ras<sup>G12D</sup>.

Supplementary Figure 3: Cell cycle and signaling in B-Raf<sup>fl/fl</sup> and C-Raf<sup>fl/fl</sup> BMKs following gene ablation. (A) Cell cycle analysis of Ad-Mock and Ad-Cre infected C-Raf<sup>fl/fl</sup> BMKs demonstrate a G2-M block following C-Raf deletion. (B) Western blot for expression of pERK and cyclin D1 is shown. (C) C-Raf deficiency does not result in apoptosis of BMK cells. Western blot for the apoptotic markers cleaved caspase 3 and cleaved PARP is shown. (D) Knock-down of Cyclin D1 results in diminished proliferation in K and BBK BMK cells. Percentage of cells with incorporated BrdU is shown. Cyclin D1 knock-down efficiency was >90% (not shown).

Supplementary Figure 4: MAPK activation and proliferation of lung tumors in C-Raf<sup>fl/fl</sup>; K-Ras<sup>LSL</sup> mice. (A) Similar MAPK activation assessed by pERK content in tumors at endpoint. (B) Similar proliferation of tumors at 12 weeks post Ad-Cre infection.
